# Supplementary material for: Visible-Light-Driven Ag-Doped BiOBr Nanoplates with an Enhanced Photocatalytic Performance for the Degradation of Bisphenol A
Source: MDPI journal article supplement (doi:10.3390/nano12111909), 2022-06-02
Supplement: s1 [file s1]

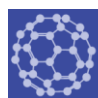

Supplementary Material

# Visible-Light-Driven Ag-Doped BiOBr Nanoplates with an Enhanced Photocatalytic Performance for the Degradation of Bisphenol A

Chu-Ya Wang \*, Qi Zeng, Li-Xia Wang, Xin Fang and Guangcan Zhu \*

School of Energy and Environment, Southeast University, Nanjing 210096, China; zeng\_qi@seu.edu.cn (Q.Z.); 220210571@seu.edu.cn (L.-X.W.); fxin@seu.edu.cn (X.F.)

\* Correspondence: wang-cy@seu.edu.cn (C.-Y.W.); gc-zhu@seu.edu.cn (G.Z.);

Tel.: +86-177-7534-6164 (C.-Y.W.); +86-189-1296-6396 (G.Z.)

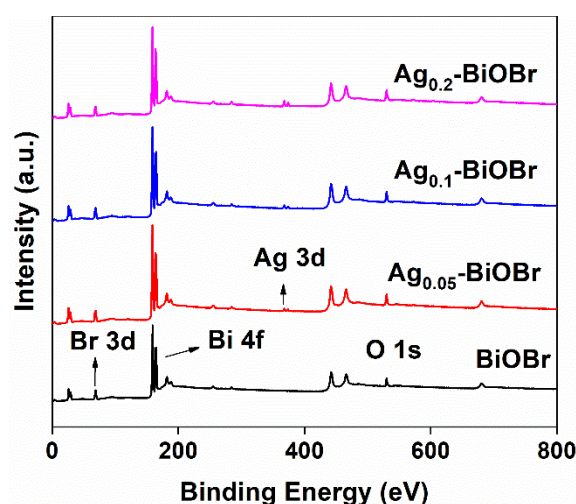

Figure S1. XPS survey spectra of BiOBr and Ag-BiOBr.

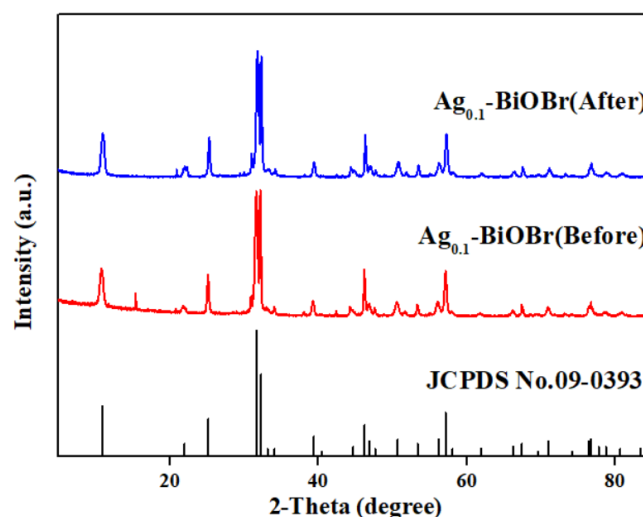

Figure S2. XRD spectra of Ag<sub>0.1</sub>-BiOBr before and after reaction.

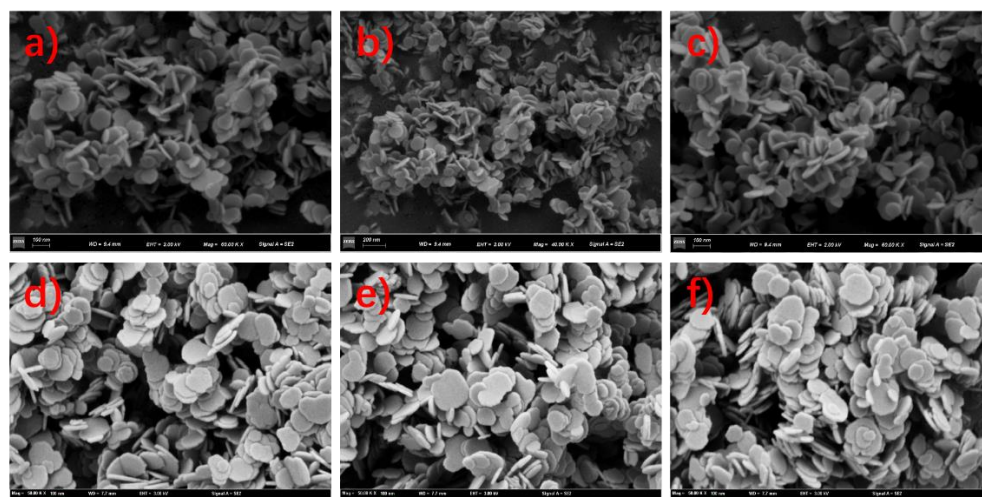

**Figure S3.** SEM images of Ag<sub>0.1</sub>-BiOBr (a-c) before and (d-f) after reaction.

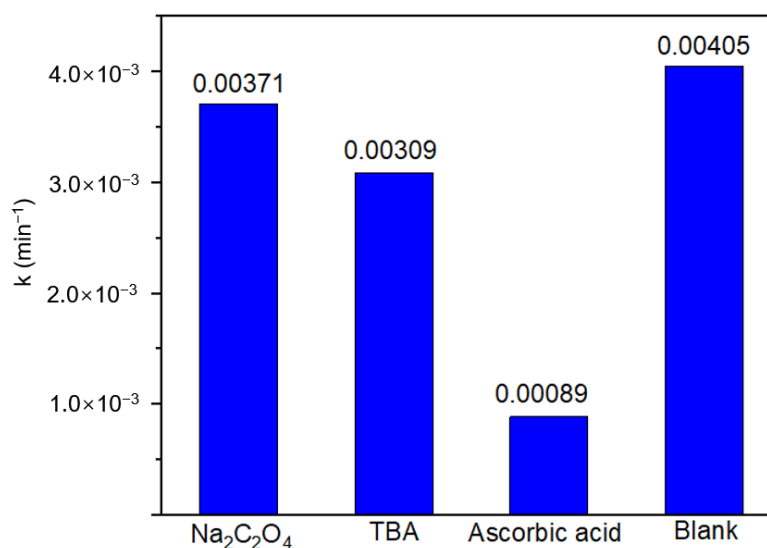

**Figure S4.** Kinetics constants of photocatalytic degradation of BPA over Ag<sub>0.1</sub>-BiOBr with and without added free radical scavengers.

**Table S1.** Comparison with the already published work.

| Previous work                                                                                                                                                                                                                                                                                                                                                                                | In our work                                                                                                                                                                                                                                                                                                                                                                                                                                        | Ref.  |
|----------------------------------------------------------------------------------------------------------------------------------------------------------------------------------------------------------------------------------------------------------------------------------------------------------------------------------------------------------------------------------------------|----------------------------------------------------------------------------------------------------------------------------------------------------------------------------------------------------------------------------------------------------------------------------------------------------------------------------------------------------------------------------------------------------------------------------------------------------|-------|
| <ul style="list-style-type: none"> <li>The combination of AgBr-Ag-BiOBr possessed a p-metal-n structure.</li> <li>The combination of Ag/AgBr/BiOBr was a Z-scheme heterojunction.</li> <li>The target pollutants were methyl orange, which can induce dye sensitization.</li> <li>The target pollutants were RhB and acid orange 7 with color which can induce dye sensitization.</li> </ul> | <ul style="list-style-type: none"> <li>The pollutant used herein was BPA which is a kind of colorless endocrine disrupting compound (EDC) without dye sensitization.</li> <li>The characterizations of products demonstrated that BiOBr possessed a smooth surface, indicating that there was no heterojunction or Schottky junction. Ag elements displayed a high dispersion in BiOBr crystal with the form of Ag(I) instead of Ag(0).</li> </ul> | [1-2] |

- The light source is UV light.
- The target pollutant was methyl orange (MO), a colored dye, could induce dye sensitization.
- In this work, we used 420 nm cutoff filter to simulate the visible light illumination condition.
- The pollutant used herein was BPA which is a kind of colorless edcs without dye sensitization

[3]

**Table S2.** BET surface areas, pore volume and pore size of the samples.

| Samples                   | BET surface area (m <sup>2</sup> /g) | Pore volume (cm <sup>3</sup> /g) | Pore size (nm) |
|---------------------------|--------------------------------------|----------------------------------|----------------|
| BiOBr                     | 12.2749                              | 0.043885                         | 14.30080       |
| Ag <sub>0.05</sub> -BiOBr | 15.4384                              | 0.107037                         | 27.73252       |
| Ag <sub>0.1</sub> -BiOBr  | 15.2018                              | 0.102173                         | 26.88460       |
| Ag <sub>0.2</sub> -BiOBr  | 20.5491                              | 0.185371                         | 36.08350       |

**Table S3.** The comparison of photodegradation efficiency of BPA over different photocatalysts.

| Photocatalysts                                   | Source of light                                                  | Amount of catalyst (mg) | Initial concentration of BPA (mg/L) | Amount of BPA solution (mL) | Reaction time (min) | Degradation rate | Ref.      |
|--------------------------------------------------|------------------------------------------------------------------|-------------------------|-------------------------------------|-----------------------------|---------------------|------------------|-----------|
| Gd <sup>3+</sup> doped BiVO <sub>4</sub>         | LED lamp (36 W, 730 lm)                                          | 1000                    | 10                                  | <50                         | 180                 | 80%              | [4]       |
| TiO <sub>2</sub> @MIL-101(Cr)                    | 125 W mercury lamp Visible light (high pressure 300W Xenon lamp) | 40                      | 50                                  | 80                          | 240                 | 92%              | [5]       |
| α-Fe <sub>2</sub> O <sub>3</sub>                 | Visible light (>420 nm, 500W Xenon lamp)                         | 50                      | —                                   | 50                          | 360                 | 93%              | [6]       |
| Bi <sub>12</sub> O <sub>17</sub> Cl <sub>2</sub> | Visible light (>420 nm, 500W Xenon lamp)                         | 20                      | 10                                  | 40                          | 120                 | 55%              | [7]       |
| Ag <sub>0.1</sub> -BiOBr                         | Visible light (>420 nm, 500W Xenon lamp)                         | 10                      | 10                                  | 50                          | 140                 | 82%              | This work |

## References

1. Dong, Y.; Feng, C.; Zhang, J.; Jiang, P.; Wang, G.; Wu, X.; Miao, A. A new p-metal-n structure AgBr-Ag-BiOBr with superior visible-light-responsive catalytic performance. *Chem. Asian J.* **2015**, *10*, 687-93.
2. Liu, T.; Zhang, Y.; Shi, Z.; Cao, W.; Zhang, L.; Liu, J.; Chen, Z. BiOBr/Ag/AgBr heterojunctions decorated carbon fiber cloth with broad-spectral photoresponse as filter-membrane-shaped photocatalyst for the efficient purification of flowing wastewater. *J. Colloid Inter. Sci.* **2021**, *587*, 633-643.
3. Liu, Q.; Yu, Z.; Li, M.; Hou, Y.; Sun, L.; Wang, L.; Peng, Z.; Chen, D.; Liu, Y. Fabrication of Ag/AgBr/Ga<sub>2</sub>O<sub>3</sub> heterojunction composite with efficient photocatalytic activity. *Mol. Catal.* **2017**, *432*, 57-63.
4. Carolina, O.N.; Yuri, P.; Varsha, S.; Netzahualpille, H.; Jürgen, M.; Mika, S. and Nancy, O.S. Gd<sup>3+</sup> doped BiVO<sub>4</sub> and visible light-emitting diodes (LED) for photocatalytic decomposition of bisphenol A, bisphenol S and bisphenol AF in water. *J. Environ. Chem. Eng.* **2021**, *9*, 105842.
5. Yuan, T.; Xiaohong, Y.; Manman, M.; Yue, J.; Xiaoli, L.; Hao, Z.; Tianwei, O. Anatase TiO<sub>2</sub>@MIL-101(Cr) nanocomposite for photocatalytic degradation of bisphenol A. *Colloid Surface A* **2020**, *596*, 124745.
6. Ye, C.; Hu, K.; Niu, Z.; Lu, Y.; Zhang, L. and Yan, K. Controllable synthesis of rhombohedral  $\alpha$ -Fe<sub>2</sub>O<sub>3</sub> efficient for photocatalytic degradation of bisphenol A. *J. Water Process Eng.* **2019**, *27*, 205-210.
7. Wang, C.Y.; Xing, Z.; Qiu, H.B.; Wang, W.K.; Huang, G.X.; Jiang, J. and Yu, H.Q. Photocatalytic degradation of bisphenol A by oxygen-rich and highly visible-light responsive Bi<sub>12</sub>O<sub>17</sub>Cl<sub>2</sub> nanobelts. *Appl. Catal. B: Environ.* **2017**, *200*, 659-665.
